# Supplementary material
Source: Springer Nature journal article supplement (https://www.springermedizin.de/resource/supplementary/12936_2010_1747_MOESM4_ESM.pdf/9541602)
Supplement: MOESM4 [file 9541602]

# ASAQ monolayer tablet stability after 3 months at 40 C/75%RH

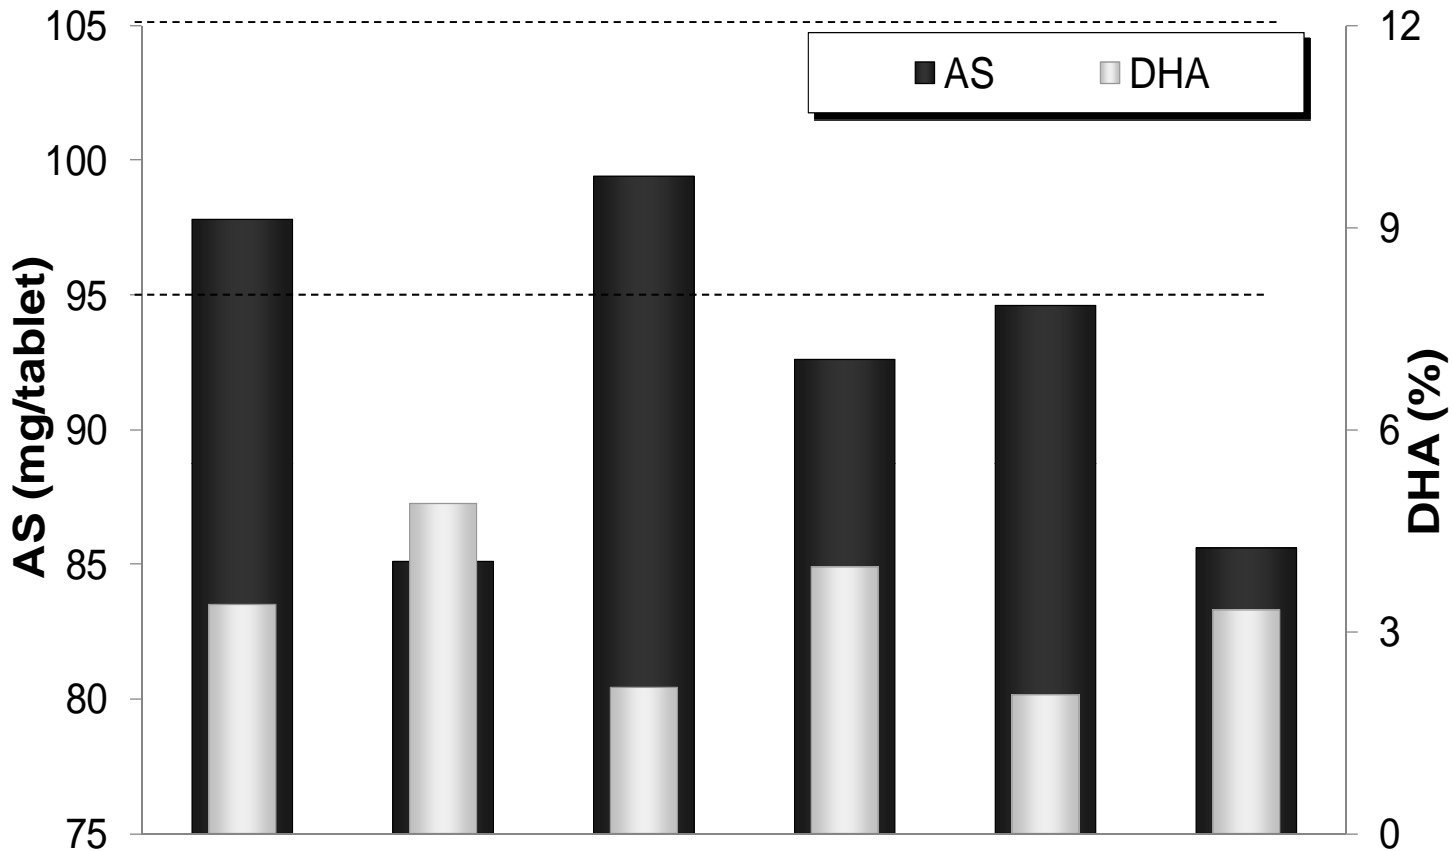

**Batch number**

30411

30412

30436

30437

30438

30439

Dry granulation

X

X

X

X

X

X

pH regulator

X

X

X

X

Hydrophobic agent

X

X

X

Controlled humidity and temperature conditions

X

X

X

X
